# Supplementary material for: Lifetime cardiovascular management of patients with previous Kawasaki disease
Source: PubMed Central journal article supplement — Heart. 2019 Dec 16;106(6):411–20. doi: 10.1136/heartjnl-2019-315925 (PMC7057818; doi:10.1136/heartjnl-2019-315925), 2019-12-16
Supplement: heartjnl-2019-315925supp001.pdf [file heartjnl-2019-315925supp001.pdf]

## APPENDIX – PAEDIATRIC AND ADULT PATIENT DRUG OVERVIEW – Lifetime Management of Kawasaki Disease

## PAEDIATRIC DRUG DOSES

| Patient Group                              | Therapy                      | Drug                                               | Dose                                                                                                                                                                                                                                                                                                                                                                                                    | Daily Max Dose                                               | Formulations                                                                                                                                    | Notes- According to current best practice.                                                                                                                                                                                                                                                                                                                          |
|--------------------------------------------|------------------------------|----------------------------------------------------|---------------------------------------------------------------------------------------------------------------------------------------------------------------------------------------------------------------------------------------------------------------------------------------------------------------------------------------------------------------------------------------------------------|--------------------------------------------------------------|-------------------------------------------------------------------------------------------------------------------------------------------------|---------------------------------------------------------------------------------------------------------------------------------------------------------------------------------------------------------------------------------------------------------------------------------------------------------------------------------------------------------------------|
| All patients with CAA persisting > 6 weeks | Antiplatelet therapy         | Aspirin                                            | Maintenance dose of 2-5mg/kg daily                                                                                                                                                                                                                                                                                                                                                                      | 75mg daily                                                   | 75mg dispersible tablet<br>Some hospitals round the dose to the nearest quarter tablet.                                                         | Patients who have CAA persisting after 6 weeks, even if these remodel, should remain on long term aspirin<br>Omit if high fever due to intercurrent disease, such as chickenpox to reduce risk of Reye's syndrome<br>Best practice is to dissolve known dose in water, rather than dissolve 75mg tablet in water – when the amount given per unit volume is unknown |
|                                            |                              | Clopidogrel (second line)                          | Maintenance dose of 0.2-1 mg/kg daily (not in BNF-C, unlicensed)                                                                                                                                                                                                                                                                                                                                        | 75mg daily                                                   | 75 mg tablet<br>25mg/5ml suspension                                                                                                             |                                                                                                                                                                                                                                                                                                                                                                     |
| Those with giant CAA - Older children      | Add in Anticoagulant therapy | Warfarin                                           | Initially 200 micrograms/kg (max. per dose 10 mg) for 1 dose on day 1, then reduced to 100 micrograms/kg once daily (max. per dose 5 mg) for the following 3 days, subsequent doses adjusted according to INR levels, induction dose may need to be altered according to condition (e.g. abnormal liver function tests, cardiac failure), concomitant interacting drugs, and if baseline INR above 1.3. | Maintain the international normalised ratio (INR) at 2.5-3.5 | Liquid 1mg/ml<br>Tablets 0.5mg/1mg/3mg/5mg                                                                                                      | Combined anti-coagulation and anti-platelet therapy are recommended for all KD patients with a coronary artery Z score ≥ 10<br><br>Check Appendix 1 of BNF-C for interactions                                                                                                                                                                                       |
| - Infants                                  |                              | Heparin (low molecular weight subcutaneous (LMWH)) | Titrate to LMWH anti-Xa level (dose depending on which LMWH being used, as per BNF-C)                                                                                                                                                                                                                                                                                                                   | Keep LMWH anti-Xa activity at 0.5-1.0 IU/mL                  | Subcutaneous injection solution, using graduated pre-filled syringes (rounding dose for ease)<br>Dose/monitoring depends on proprietary version |                                                                                                                                                                                                                                                                                                                                                                     |

## Additional comments:

- ≡ It is recommended that the drug doses are checked against the BNF and BNFC for updated guidance and to ensure correct dosing.
- ≡ Note, many of these are unlicensed for use in children. The formulations are based on current best evidence from the writing group and discussion should ensure patients / carers are aware of the lack of evidence and possible choices to consider.
- ≡ Aspirin does not easily disperse <https://ejhp.bmj.com/content/early/2019/06/11/ejhpharm-2019-001903>  
<https://www.researchgate.net/publication/312446743> Dose uniformity of samples prepared from dispersible aspirin tablets for paediatric use
- ≡ For administration to use MEDUSA monographs (<http://www.injguide.nhs.uk>)
- ≡ [BNFc is the British National Formulary for Children](#)
- ≡ <https://www.medicines.org.uk/emc> (to review licensed side effect profiles and monitoring)
- ≡ \*a guideline which may be useful <http://www.avon.nhs.uk/dms/download.aspx?did=19365>

DISCLAIMER: THIS TABLE IS FOR GUIDANCE. DRUG FORMULATIONS AND RECOMMENDED DOSAGES CAN CHANGE SO PRESCRIBERS SHOULD CHECK WITH THE BRITISH NATIONAL FORMULARY OR LOCAL PROTOCOLS

## APPENDIX – PAEDIATRIC AND ADULT PATIENT DRUG OVERVIEW – Lifetime Management of Kawasaki Disease

| Patient Group                             | Therapy                     | Drug                                            | Dose                                                                                                                                                                                                                                                                                                                                                                                                                                                                               | Daily Max Dose                                                                                                                                | Formulations                                                                                                                                                                                                                               | Notes                                                                                                                                                                                    |
|-------------------------------------------|-----------------------------|-------------------------------------------------|------------------------------------------------------------------------------------------------------------------------------------------------------------------------------------------------------------------------------------------------------------------------------------------------------------------------------------------------------------------------------------------------------------------------------------------------------------------------------------|-----------------------------------------------------------------------------------------------------------------------------------------------|--------------------------------------------------------------------------------------------------------------------------------------------------------------------------------------------------------------------------------------------|------------------------------------------------------------------------------------------------------------------------------------------------------------------------------------------|
| Children presenting with acute thrombosis | Thrombolysis                | tPA (Tissue plasminogen activator) (alteplase)  | By intravenous infusion:<br><b>neonate:</b> 100-500 micrograms per kilogram per hour for 3 to 6 hours; use ultrasound (echocardiography) to monitor effect before considering a 2nd course of treatment<br><b>child:</b> 100 to 500 micrograms per kilogram per hour for 3 to 6 hours, use ultrasound assessment to monitor effect before considering a 2nd course of treatment<br><b>If using systemically, then the dose is 10 x than if by catheter directed local delivery</b> | Maximum 100mg daily                                                                                                                           | Actilyse 10mg or 20mg powder and solvent for solution for injection – 1mg in 1ml. Draw up 1mg, make up to 5ml in normal saline 1ml=200mcg<br>10mg, 20mg, 50mg powder and solvent (administer via a dedicated line <b>not</b> with heparin) | Include monitoring of full blood count, clotting, fibrinogen and anti-Xa activity daily.<br><br>Keep fibrinogen >100mg/dl and platelets >50,000/mm <sup>3</sup>                          |
|                                           |                             | Concurrent Heparin (Unfractionated heparin UFH) | 10 units/kg/hr IV maintenance (no bolus when running with alteplase)                                                                                                                                                                                                                                                                                                                                                                                                               | Max 500 units/hr.<br>To achieve APTT 1.5-2.5 or<br>Activated clotting time of 200-250<br>or<br>Unfractionated anti-Xa activity 0.35-0.7 IU/mL | Intravenous solution                                                                                                                                                                                                                       |                                                                                                                                                                                          |
|                                           |                             | Heparin (UFH) only                              | 75units/kg bolus IV<br>Then 20 units/kg/hr IV maintenance                                                                                                                                                                                                                                                                                                                                                                                                                          |                                                                                                                                               |                                                                                                                                                                                                                                            |                                                                                                                                                                                          |
|                                           | Chest pain                  | Glyceryl trinitrate (use BNF-C)                 | Initially 0.2-0.5microgram/kg/minute IV adjusted according to response<br>Then: 1-3micrograms/kg/minute                                                                                                                                                                                                                                                                                                                                                                            | Max 10 micrograms /kg/minute                                                                                                                  | Intravenous solution                                                                                                                                                                                                                       |                                                                                                                                                                                          |
| With stent insertion                      | IIb/IIIa platelet inhibitor | Abciximab                                       | 250 microgram/kg as IV bolus over 1 min then 125 nanograms/kg/min infusion every 12 hours                                                                                                                                                                                                                                                                                                                                                                                          | Max 10 micrograms /minute                                                                                                                     | Dilute required dose in infusion fluid                                                                                                                                                                                                     | <b>Not commonly used in paediatrics, doses are those for adults</b>                                                                                                                      |
|                                           |                             | Eptifibatide                                    | 180 microgram/kg IV bolus, then 2 microgram/kg/min infusion for 12 hours<br>Often combine with heparin                                                                                                                                                                                                                                                                                                                                                                             |                                                                                                                                               | Solution for injection/<br>solution for infusion                                                                                                                                                                                           | <b>Not commonly used in paediatrics, doses are those for adults</b><br>Measure baseline prothrombin time, APTT, platelet count, Hb and creatinine<br>Monitor again at 6 hours then daily |
|                                           | Anti-inflammatory           | Atorvastatin                                    | Child 10-17 years 10mg daily                                                                                                                                                                                                                                                                                                                                                                                                                                                       | 20mg/daily                                                                                                                                    | 10mg, 20mg chewable tablets                                                                                                                                                                                                                | Potential anti-inflammatory benefit                                                                                                                                                      |

## Additional comments:

- ≡ It is recommended that the drug doses are checked against the BNF and BNFC for updated guidance and to ensure correct dosing.
- ≡ Note, many of these are unlicensed for use in children. The formulations are based on current best evidence from the writing group and discussion should ensure patients / carers are aware of the lack of evidence and possible choices to consider.
- ≡ Aspirin does not easily disperse <https://ejhp.bmj.com/content/early/2019/06/11/ejhpharm-2019-001903>  
<https://www.researchgate.net/publication/312446743> Dose uniformity of samples prepared from dispersible aspirin tablets for paediatric use
- ≡ For administration to use MEDUSA monographs (<http://www.injguide.nhs.uk>)
- ≡ [BNFc is the British National Formulary for Children](#)
- ≡ <https://www.medicines.org.uk/emc> (to review licensed side effect profiles and monitoring)
- ≡ \*a guideline which may be useful <http://www.avon.nhs.uk/dms/download.aspx?did=19365>

**DISCLAIMER: THIS TABLE IS FOR GUIDANCE. DRUG FORMULATIONS AND RECOMMENDED DOSAGES CAN CHANGE SO PRESCRIBERS SHOULD CHECK WITH THE BRITISH NATIONAL FORMULARY OR LOCAL PROTOCOLS**

## APPENDIX – PAEDIATRIC AND ADULT PATIENT DRUG OVERVIEW – Lifetime Management of Kawasaki Disease

## ADULT DRUG DOSES

| Patient Group                    | Therapy                                              | Drug                                                                                            | Dose                                                                                                                                                                             | Daily Max Dose                                               | Formulations                                | Notes                                                                                                                                                                                                                            |
|----------------------------------|------------------------------------------------------|-------------------------------------------------------------------------------------------------|----------------------------------------------------------------------------------------------------------------------------------------------------------------------------------|--------------------------------------------------------------|---------------------------------------------|----------------------------------------------------------------------------------------------------------------------------------------------------------------------------------------------------------------------------------|
| All patients with history of CAA | Antiplatelet therapy                                 | Aspirin                                                                                         | Maintenance dose 75mg daily                                                                                                                                                      | 75mg daily                                                   | 75mg dispersible tablet                     | Patients who have CAA persisting after 6 weeks, even if these remodel, should remain on long term aspirin.                                                                                                                       |
|                                  |                                                      | <b>AND/OR</b><br>Clopidogrel                                                                    | Maintenance dose of 75mg daily                                                                                                                                                   | 75mg daily                                                   | 75mg tablets                                | Consider alternative or addition of an antagonist of ADP-mediated activation platelet aggregation such as clopidogrel short term dual therapy                                                                                    |
|                                  | PLUS Gastric protection if dual antiplatelet therapy | Lansoprazole                                                                                    | 30mg daily                                                                                                                                                                       | 30mg daily                                                   | 30mg capsule<br>30mg orodispersible tablets | Lansoprazole or Ranitidine                                                                                                                                                                                                       |
|                                  |                                                      | Ranitidine                                                                                      | 150mg twice daily                                                                                                                                                                | 300mg twice daily                                            | 150mg tablets<br>150mg effervescent tablets | Lansoprazole or Ranitidine                                                                                                                                                                                                       |
| Those with giant CAA             | Add in Anticoagulant therapy                         | Warfarin<br><b>OR</b><br>Direct oral anticoagulant if warfarin not tolerated or contraindicated | Titrate to target international normalised ratio (INR)                                                                                                                           | Maintain the international normalised ratio (INR) at 2.5-3.5 | Tablets 0.5/1/3/5mg                         | Combined anti-coagulation and anti-platelet therapy are recommended for all KD patients with a coronary artery Z score ≥ 10<br>Initial therapy to be covered with heparin to avoid paradoxical thrombosis at sub-therapeutic INR |
|                                  |                                                      | Apixaban                                                                                        | 5mg twice daily. Reduce dose to 2.5mg twice daily in patients with at least two of the following: Age over 80 years, bodyweight <61kg, or serum creatinine 133micromol/L or more | 10mg twice daily                                             | Tablets 2.5mg/5mg                           |                                                                                                                                                                                                                                  |
|                                  |                                                      | Rivaroxaban                                                                                     | 2.5mg twice daily                                                                                                                                                                | 20mg daily                                                   | Tablets 2.5mg/5mg<br>/15mg/20mg             |                                                                                                                                                                                                                                  |

## Additional comments:

- ≡ It is recommended that the drug doses are checked against the BNF and BNFC for updated guidance and to ensure correct dosing.
- ≡ Note, many of these are unlicensed for use in children. The formulations are based on current best evidence from the writing group and discussion should ensure patients / carers are aware of the lack of evidence and possible choices to consider.
- ≡ Aspirin does not easily disperse <https://ejhp.bmj.com/content/early/2019/06/11/ejhpharm-2019-001903>  
<https://www.researchgate.net/publication/312446743> Dose uniformity of samples prepared from dispersible aspirin tablets for paediatric use
- ≡ For administration to use MEDUSA monographs (<http://www.injguide.nhs.uk>)
- ≡ [BNFc is the British National Formulary for Children](#)
- ≡ <https://www.medicines.org.uk/emc> (to review licensed side effect profiles and monitoring)
- ≡ \*a guideline which may be useful <http://www.avon.nhs.uk/dms/download.aspx?did=19365>

**DISCLAIMER: THIS TABLE IS FOR GUIDANCE. DRUG FORMULATIONS AND RECOMMENDED DOSAGES CAN CHANGE SO PRESCRIBERS SHOULD CHECK WITH THE BRITISH NATIONAL FORMULARY OR LOCAL PROTOCOLS**

## APPENDIX – PAEDIATRIC AND ADULT PATIENT DRUG OVERVIEW – Lifetime Management of Kawasaki Disease

| Patient Group                           | Therapy                                     | Drug            | Dose                                                                                                                                                                                                                                                                                                                                | Daily Max Dose                                                | Formulations                                                                                                                                                                             | Notes                                                                                                                                                    |
|-----------------------------------------|---------------------------------------------|-----------------|-------------------------------------------------------------------------------------------------------------------------------------------------------------------------------------------------------------------------------------------------------------------------------------------------------------------------------------|---------------------------------------------------------------|------------------------------------------------------------------------------------------------------------------------------------------------------------------------------------------|----------------------------------------------------------------------------------------------------------------------------------------------------------|
| Adults presenting with acute thrombosis | Thrombolysis                                | tPA (Alteplase) | <p><b>For adults up to 65Kg give:</b><br/>15mg initially (within 6 hours of event)<br/>Followed by 0.75mg/kg over 30 minutes,<br/>Then by 0.5mg/kg over 60 minutes</p> <p><b>For adults over 65Kg give:</b><br/>15mg initially (within 6 hours of event)<br/>Followed by 50mg over 30 minutes,<br/>Then by 35mg over 60 minutes</p> | Intravenous infusion<br>Maximum dose 100mg<br>over 90 minutes | Actilyse 10mg or 20mg powder and solvent for solution for injection – 1mg in 1ml. Draw up 1mg and make up to 10ml with normal saline (1ml=100mcg)<br>10mg, 20mg, 50mg powder and solvent | <p>Can also be given intracoronary-consult advice for dose.</p> <p>Include monitoring of full blood count, clotting, fibrinogen and anti-Xa activity</p> |
| With stent insertion                    | IIb/IIIa platelet inhibitor (or Tirofiban*) | Abciximab       | 250 microgram/kg as IV bolus over 1 minute then immediately followed by an infusion of 125 nanograms/kg/min for 12 hours (started 10-60 minutes after PCI)                                                                                                                                                                          | Max 10 micrograms/minute infusion                             | Solution for injection                                                                                                                                                                   | <p>Measure baseline prothrombin time, APTT, platelet count, Hb, and creatinine</p> <p>Monitor again at 6 hours then daily</p>                            |
|                                         |                                             | Eptifibatide    | 180 microgram/kg IV bolus, then 2 microgram/kg/min infusion for up to 72 hours (up to 96 hours if PCI during treatment see BNF)                                                                                                                                                                                                     |                                                               | Solution for injection/solution for infusion                                                                                                                                             |                                                                                                                                                          |
|                                         | Anti-Inflammatory                           | Atorvastatin    | 20mg/daily                                                                                                                                                                                                                                                                                                                          | Max 80mg daily                                                | 20mg Tablets                                                                                                                                                                             | Potential anti-inflammatory benefit                                                                                                                      |

Good practice in prescribing and managing medicines and devices (2013)

<https://www.gmc-uk.org/ethical-guidance/ethical-guidance-for-doctors/prescribing-and-managing-medicines-and-devices/prescribing-unlicensed-medicines>

**Additional comments:**

- ≡ It is recommended that the drug doses are checked against the BNF and BNFC for updated guidance and to ensure correct dosing.
- ≡ Note, many of these are unlicensed for use in children. The formulations are based on current best evidence from the writing group and discussion should ensure patients / carers are aware of the lack of evidence and possible choices to consider.
- ≡ Aspirin does not easily disperse <https://ejhp.bmj.com/content/early/2019/06/11/ejhpharm-2019-001903>  
[https://www.researchgate.net/publication/312446743\\_Dose\\_uniformity\\_of\\_samples\\_prepared\\_from\\_dispersible\\_aspirin\\_tablets\\_for\\_paediatric\\_use](https://www.researchgate.net/publication/312446743_Dose_uniformity_of_samples_prepared_from_dispersible_aspirin_tablets_for_paediatric_use)
- ≡ For administration to use MEDUSA monographs (<http://www.injguide.nhs.uk>)
- ≡ [BNFc is the British National Formulary for Children](#)
- ≡ <https://www.medicines.org.uk/emc> (to review licensed side effect profiles and monitoring)
- ≡ \*a guideline which may be useful <http://www.avon.nhs.uk/dms/download.aspx?did=19365>

**DISCLAIMER: THIS TABLE IS FOR GUIDANCE. DRUG FORMULATIONS AND RECOMMENDED DOSAGES CAN CHANGE SO PRESCRIBERS SHOULD CHECK WITH THE BRITISH NATIONAL FORMULARY OR LOCAL PROTOCOLS**
